# Supplementary material for: Resurrection of a global, metagenomically defined gokushovirus
Source: eLife. 2020 Feb 26;9:e51599. doi: 10.7554/eLife.51599 (PMC7062461; doi:10.7554/eLife.51599)
Supplement: Supplementary file 1. [file elife-51599-supp1.xlsx]

## Sheet: Sheet1
Supplementary File 1: Enterobacteria harboring gokushovirus prophages.
Species	Strain	Assembly Accession	Source	Country	Year	O-Antigen	H-Antigen	Prophage contig	Phage dif-site	Bacterial dif-site	Leaf in tree	Clade
Escherichia coli	HT2012092	GCF_002972255.1	Marmota himalayana	China	2012	n/a	n/a	NZ JZNV01000079	GGTGCGCATAATGTAAGGTTATGTCAAA	AGTGCGCATAATGTATATTATGTTAAAT	1	A
Escherichia coli	HT2012160	GCF_002972845.1	Marmota himalayana	China	2012	n/a	n/a	NZ JZPT01000240	GGTGCGCATAATGTAAGGTTATGTCAAA	AGTGCGCATAATGTATATTATGTTAAAT	2	A
Escherichia coli	HT2012146	GCF_002973205.1	Marmota himalayana	China	2012	n/a	n/a	NZ JZPZ01000031	GGTGCGCATAATGTAAGGTTATGTCAAA	AGTGCGCATAATGTATATTATGTTAAAT	3	A
Escherichia coli	HT2012096	GCF_002973245.1	Marmota himalayana	China	2012	n/a	n/a	NZ JZQA01000025	GGTGCGCATAATGTAAGGTTATGTCAAA	AGTGCGCATAATGTATATTATGTTAAAT	4	A
Escherichia coli	HT2012024	GCF_002972395.1	Marmota himalayana	China	2012	n/a	n/a	NZ JZOS01000011	TAGGCGTACAATGTAAGGTTATGTCAAA	AGTGTGCATAATTTATTTTATGTTAAAT	5	B
Escherichia coli	HT2012191	GCF_002972915.1	Marmota himalayana	China	2012	n/a	n/a	NZ JZPI01000038	TAGGCGTACAATGTAAGGTTATGTCAAA	AGTGTGCATAATTTATTTTATGTTAAAT	6	B
Escherichia coli	HT2012DB11	GCF_002971495.1	Marmota himalayana	China	2012	n/a	n/a	NZ JZND01000022	TAGGCGTACAATGTAAGGTTATGTCAAA	AGTGTGCATAATTTATTTTATGTTAAAT	7	B
Escherichia coli	HT2012047	GCF_002972135.1	Marmota himalayana	China	2012	n/a	n/a	NZ JZOW01000052	TAGGCGTACAATGTAAGGTTATGTCAAA	AGTGTGCATAATTTATTTTATGTTAAAT	8	B
Escherichia coli	HT2012044	GCF_002972495.1	Marmota himalayana	China	2012	n/a	n/a	NZ JZOV01000043	TAGGCGTACAATGTAAGGTTATGTCAAA	AGTGTGCATAATTTATTTTATGTTAAAT	9	B
Escherichia coli	HT2012007	GCF_002972375.1	Marmota himalayana	China	2012	n/a	n/a	NZ JZOF01000021	TAGGCGTACAATGTAAGGTTATGTCAAA	AGTGTGCATAATTTATTTTATGTTAAAT	10	B
Escherichia coli	HT2012046	GCF_002971575.1	Marmota himalayana	China	2012	n/a	n/a	NZ JZNL01000028	TAGGCGTACAATGTAAGGTTATGTCAAA	AGTGTGCATAATTTATTTTATGTTAAAT	11	B
Escherichia coli	HT201266	GCF_002972835.1	Marmota himalayana	China	2012	n/a	n/a	NZ JZPQ01000005	GGTGCGCATAATGTAAGGTTATGTCAAA	AGTGCGCATAATGTATATTATGTTAAAT	12	B
Escherichia coli	HT2012081	GCF_002972215.1	Marmota himalayana	China	2012	n/a	n/a	NZ JZNS01000038	TAGGCGTACAATGTAAGGTTATGTCAAA	AGTGCGCATAATTTATTTTATGTTAAAT	13	B
Escherichia coli	HT2012DB19	GCF_002971555.1	Marmota himalayana	China	2012	n/a	n/a	NZ JZNH01000041	TAGGCGTACAATGTAAGGTTATGTCAAA	AGTGCGCATAATTTATTTTATGTTAAAT	14	B
Escherichia coli	HT2012073	GCF_002972565.1	Marmota himalayana	China	2012	n/a	n/a	NZ JZPF01000165	GGTGCGCATAATGTAAGGTTATGTCAAA	AGTGCGCATAATGTATATTATGTTAAAT	15	B
Escherichia coli	HT2012147	GCF_002973235.1	Marmota himalayana	China	2012	n/a	n/a	NZ JZPY01000120	GGTGCGCATAATGTAAGGTTATGTCAAA	AGTGCGCATAATGTATATTATGTTAAAT	16	B
Escherichia coli	HT2012124	GCF_002973075.1	Marmota himalayana	China	2012	n/a	n/a	NZ JZQK01000131	GGTGCGCATAATGTAAGGTTATGTCAAA	AGTGCGCATAATGTATATTATGTTAAAT	17	B
Escherichia coli	HT2012DB15	GCF_002971705.1	Marmota himalayana	China	2012	n/a	n/a	NZ JZNF01000013	GGTGCGCATAATGTAAGGTTATGTCAAA	AGTGCGCATAATGTATATTATGTTAAAT	18	B
Escherichia coli	HT2012095	GCF_002972615.1	Marmota himalayana	China	2012	n/a	n/a	NZ JZQU01000104	GGTGCGCATAATGTAAGGTTATGTCAAA	AGTGCGCATAATGTATATTATGTTAAAT	19	B
Escherichia coli	HT2012098	GCF_002972245.1	Marmota himalayana	China	2012	n/a	n/a	NZ JZNW01000179	GGTGCGCATAATGTAAGGTTATGTCAAA	AGTGCGCATAATGTATATTATGTTAAAT	20	B
Escherichia coli	HT2012N12	GCF_002971645.1	Marmota himalayana	China	2012	n/a	n/a	NZ JZMX01000110	GGTGCGCATAATGTAAGGTTATGTCAAA	AGTGCGCATAATGTATATTATGTTAAAT	21	B
Escherichia coli	HT2012DB23	GCF_002971415.1	Marmota himalayana	China	2012	n/a	n/a	NZ JZMW01000153	GGTGCGCATAATGTAAGGTTATGTCAAA	AGTGCGCATAATGTATATTATGTTAAAT	22	B
Escherichia coli	HT2012N10	GCF_002971415.1	Marmota himalayana	China	2012	n/a	n/a	NZ_JZMW01000153	GGTGCGCATAATGTAAGGTTATGTCAAA	AGTGCGCATAATGTATATTATGTTAAAT	23	B
Escherichia coli	MOD1-EC5200	GCF_002517065.1	Odocoileus virginianus/intestine	USA	1971	O76	H19	NZ NOFF01000026	CGCATAATGTATATTTAGTTTAAC	AGTGCGCATAATGTATATTATGTTAAAT	24	C
Escherichia coli	MOD1-EC5181	GCF_002231775.1	soil	USA	1993	O132	H8	NZ NLRI01000019	TGTGCGCATAATGTATATTTAGTTTAAC	AGTGCGCATAATGTATATTATGTTAAAT	25	C
Escherichia coli	NCTC9043	GCF_900449585.1	n/a	n/a	n/a	O43	H2	NZ UGDQ01000001	GGTGCGCATAATGTATATTTAGTTTAAC	AGTGCGCATAATGTATATTATGTTAAAT	26	C
Escherichia coli	MOD1-EC6266	GCF_002512835.1	Capra sp./feces	USA	1986	O124	H21	NZ NMJO01000040	GGTGCGCATAATGTATATTTAGTTTAAC	AGTGCGCATAATGTATATTATGTTAAAT	27	C
Escherichia coli	55-J122-A	GCF_005400085.1	Bos taurus/feces	France	2011	n/a	n/a	BIDL01000006	GATGCGCATAATGTATATTTAGTTTAAC	AGTGCGCATAATGTATATTATGTTAAAT	28	C
Escherichia coli	82-F63-A	GCF_005401785.1	Bos taurus/feces	France	2011	n/a	n/a	BIEM01000005	GGTGCGCATAATGTATATTTAGTTTAAC	AGTGCGCATAATGTATATTATGTTAAAT	29	C
Escherichia coli	18-B32-A	GCF_005399385.1	Bos taurus/feces	France	2010	n/a	n/a	BICB01000013	GGTGCGCATAATGTATATTTAGTTTAAC	AGTGCGCATAATGTATATTATGTTAAAT	30	C
Escherichia coli	MOD1-EC6019	GCF_002542565.1	food sample	USA	2010	O150	H8	NZ NMEU01000021	GGTGCGCATAATGTATATTTAGTTTAAC	AGTGCGCATAATGTATATTATGTTAAAT	31	C
Escherichia coli	MOD1-5840	GCF_002546275.1	Bos taurus/liver	USA	1984	O10	H42	NZ NOBE01000024	GGTGCGCATAATGTATATTTAGTTTAAC	AGTGCGCATAATGTATATTATGTTAAAT	32	C
Escherichia coli	MOD1-EC5150	GCF_002516905.1	Bos tarus/uterus	USA	2007	O58	H40	NZ NOGE01000022	GGTGCGCATAATGTATATTTAGTTTAAC	AGTGCGCATAATGTATATTATGTTAAAT	33	C
Escherichia coli	MOD1-EC5156	GCF_002474975.1	Bos tarus/uterus	USA	2007	n/a	n/a	NZ NOFY01000025	GGTGCGCATAATGTATATTTAGTTTAAC	AGTGCGCATAATGTATATTATGTTAAAT	34	C
Escherichia coli	Mod1-EC5154	GCF_002474995.1	Bos tarus/uterus	USA	2007	n/a	n/a	NZ NOGA01000025	GGTGCGCATAATGTATATTTAGTTTAAC	AGTGCGCATAATGTATATTATGTTAAAT	35	C
Escherichia coli	06-A102-A	GCF_005399025.1	Bos taurus/feces	France	2010	n/a	n/a	BIBJ01000001	GGTGCGCATAATGTATATTTAGTTTAAC	AGTGCGCATAATGTATATTATGTTAAAT	36	C
Escherichia coli	VREC0476	GCF_900479515.1	Bos taurus/feces	UK	2015	O112	H19	NZ UCXM01000001	GGTGCGCATAATGTATATTTAGTTTAAC	AGTGCGCATAATGTATATTATGTTAAAT	37	C
Escherichia coli	VREC503	GCF_900479785.1	Bos taurus/feces	UK	2015	n/a	n/a	NZ UCYL01000019	CGCATAATGTATATTTAGTTTAAC	AGTGCGCATAATGTATATTATGTTAAAT	38	C
Escherichia coli	VREC504	GCF_900479915.1	Bos taurus/feces	UK	2015	n/a	n/a	NZ UCYV01000015	CGCATAATGTATATTTAGTTTAAC	AGTGCGCATAATGTATATTATGTTAAAT	39	C
Escherichia coli	96-J77-A	GCF_005402165.1	Bos taurus/feces	France	2011	n/a	n/a	BIFA01000208	GGTGCGCATAATGTATATTTAGTTTAAC	AGTGCGCATAATGTATATTATGTTAAAT	40	C
Escherichia coli	Sum2013WWKANeu53	GCF_003145435.1	wastewater	Germany	2013	n/a	n/a	NZ NBDF01000039	GGTGCGCATAATGTATATTTAGTTTAAC	AGTGCGCATAATGTATATTATGTTAAAT	41	C
Escherichia coli	JHI5002	GCF_900236035.1	Bos taurus/feces	UK	2008	n/a	n/a	NZ OEDI01000042	GGTGCGCATAATGTATATTTAGTTTAAC	AGTGCGCATAATGTATATTATGTTAAAT	42	C
Escherichia coli	VREC0481	GCF_900490275.1	Bos taurus/feces	UK	2015	n/a	n/a	NZ UEJZ01000015	GGTGCGCATAATGTATATTTAGTTTAAC	AGTGCGCATAATGTATATTATGTTAAAT	43	C
Escherichia coli	30-D80-A DNA	GCF_005399625.1	Bos taurus/feces	France	2010	n/a	n/a	BICN01000004	GATGCGCATAATGTATATTTAGTTTAAC	AGTGCGCATAATGTATATTATGTTAAAT	44	C
Escherichia coli	131/07	GCF_001637645.1	Bos taurus/mastitis	Germany	2007	n/a	n/a	NZ JXUH01000043	n/a	AGTGCGCATAATGTATATTATGTTAAAT	45	D
Escherichia coli	G51	GCF_001576455.1	Bos taurus/mastitis	Germany	n/a	n/a	n/a	NZ LOPO01000097	n/a	AGTGCGCATAATGTATATTATGTTAAAT	46	D
Escherichia coli	VREC0416	GCF_900490235.1	Bos taurus/feces	UK	2015	n/a	n/a	NZ UEKF01000017	GGTGCGCATAATGTAAAGTTATGTCAAA	AGTGCGCATAATGTATATTATGTTAAAT	47	D
Escherichia coli	VREC0417	GCF_900478705.1	Bos taurus/feces	UK	2015	n/a	n/a	NZ UCUN01000018	GGTGCGCATAATGTAAAGTTATGTCAAA	AGTGCGCATAATGTATATTATGTTAAAT	48	D
Escherichia coli	VREC0441	GCF_900479135.1	Bos taurus/feces	UK	2015	n/a	n/a	NZ UCWD01000054	n/a	AGTGCGCATAATGTATATTATGTTAAAT	49	D
Escherichia coli	VREC0439	GCF_900479185.1	Bos taurus/feces	UK	2015	n/a	n/a	NZ UCWK01000051	n/a	AGTGCGCATAATGTATATTATGTTAAAT	50	D
Escherichia coli	VREC0506	GCF_900479695.1	Bos taurus/feces	UK	2015	n/a	n/a	NZ UCYG01000002	ATGCGCATAATGTAAAGTTATGTCAAA	AGTGCGCATAATGTATATTATGTTAAAT	51	D
Escherichia coli	G301	GCF_001576205.1	Bos taurus/mastitis	UK	n/a	n/a	n/a	NZ LOPD01000013	GGTGCGCATAATGTAAAGTTATGTCAAA	AGTGCGCATAATGTATATTATGTTAAAT	52	D
Escherichia coli	34-F30-A	GCF_005399705.1	Bos taurus/feces	France	2011	n/a	n/a	BICR01000011	TGTGCGCATAATGTAAAGTTATGTCAAA	AGTGCGCATAATGTATATTATGTTAAAT	53	D
Escherichia coli	VREC0615	GCF_900480535.1	Bos taurus/feces	UK	2015	n/a	n/a	NZ UDBR01000019	GGTGCGCGTAATGTAACGTTATGTCAAA	AGTGCGCATAATGTATATTATGTTAAAT	54	D
Escherichia coli	VREC0483	GCF_900479425.1	Bos taurus/feces	UK	2015	n/a	n/a	NZ UCXG01000014	GGTGCGCATAATGTAAAGTTATGTCAAA	AGTGCGCATAATGTATATTATGTTAAAT	55	D
Escherichia coli	G303	GCF_001576095.1	Bos taurus/mastitis	UK	n/a	n/a	n/a	NZ LOPE01000019	n/a	AGTGCGCATAATGTATATTATGTTAAAT	56	D
Escherichia coli	OLC1558	GCF_002531285.1	n/a	Canada	2014	n/a	n/a	NZ NWRV01000002	GGTGCGCGTAATGTAAAGTTATGTCAAA	AGTGCGCATAATGAGGCGTTATGGTAAA	57	D
Escherichia coli	C5	GCF_001900535.1	Bos taurus/feces	China	n/a	O10	H16	NZ CP010122	GGTGCGCATAATGTAAAGTTATGTCAAA	AGTGCGCATAATGTATATTATGTTAAAT	58	D
Escherichia coli	HT2012EP03	GCF_002971175.1	Marmota himalayana	China	2012	n/a	n/a	NZ JZMN01000001	GGTGCGCATAATGTAAAGTTATGTCAAA	AGTGCGCATAATGTATATTATGTTAAAT	59	D
Escherichia coli	HT2012EP08	GCF_002971095.1	Marmota himalayana	China	2012	n/a	n/a	NZ JZMH01000001	GGTGCGCATAATGTAAAGTTATGTCAAA	AGTGCGCATAATGTATATTATGTTAAAT	60	D
Escherichia coli	HT2012039	GCF_002971965.1	Marmota himalayana	China	2012	n/a	n/a	NZ JZOL01000106	GGTGCGCATAATGTAAAGTTATGTCAAA	AGTGCGCATAATGTATATTATGTTAAAT	61	D
Escherichia coli	HT2012004	GCF_002972395.1	Marmota himalayana	China	2012	n/a	n/a	NZ JZOD01000076	GGTGCGCATAATGTAAAGTTATGTCAAA	AGTGCGCATAATGTATATTATGTTAAAT	62	D
Escherichia coli	HT2012134	GCF_002973135.1	Marmota himalayana	China	2012	n/a	n/a	NZ JZQG01000062	n/a	AGTGCGCATAATGTATATTATGTTAAAT	63	D
Escherichia coli	304	GCF_001420065.1	Bos taurus	Tanzania	2015	n/a	n/a	NZ LIVI01000020	GGTGCGCATAATGTAAGGTTATGTCAAA	AGTGCGCATAATGTATATTATGTTAAAT	64	-
Escherichia marmotae*	MOD1-EC6097	GCF_002965265.1	Anas platyrhynchos/feces	USA	2011	O10	H56	NZ PTSO01000029	GGTGCGCATAATGTATATTTAGTTTAAC	AGTGCGCATAATGTATATTATGTTAAAT	65	E
Escherichia marmotae*	MOD1-EC6098	GCF_002965865.1	Sus scrofa/pleural cavity	USA	1983	O10	H56	NZ PTSN01000025	GGTGCGCATAATGTATATTTAGTTTAAC	AGTGCGCATAATGTATATTATGTTAAAT	66	E
Escherichia coli	1724	GCF_002810265.1	Homo sapiens/UTI	Argentina	2016	n/a	n/a	NZ PIJS01000026	GGTGCGCATAATGTATATAATGTTAAGG	AGTGCGCATAATGTATATTATGTTAAAT	67	-
Escherichia coli	MOD1-EC6156	GCF_002535295.1	Polysticta stelleri	USA	2012	n/a	n/a	NZ NMBT01000003	GGTGCGCATAATGTATATTTAGTTTAAC	AGTGCGCATAATGTATATTATGTTAAAT	68	F
Escherichia coli	MOD1-EC6155	GCF_002535945.1	Polysticta stelleri	USA	2012	O43	H2	NZ NMBU01000011	GGTGCGCATAATGTATATTTAGTTTAAC	AGTGCGCATAATGTATATTATGTTAAAT	69	F
Escherichia sp.	E10V5	GCF_004212315.1	Freshwater	Hong Kong	2017	n/a	n/a	RHJM01000022	GGTGCGCATAATGTATATTTAGGTTAAA	AGTGCGCATAATGTATATTATGTTAAAT	70	F
Escherichia coli	201534 aEPEC	GCF_001283645.1	Homo sapiens/feces	Mali	2009	O103	H8	NZ CYAS01000031	GTGCGCATAATGTATATTTAGTTTAAC	AGTGCGCATAATGTATATTATGTTAAAT	71	G
Escherichia coli	403523	GCF_001284405.1	Homo sapiens/feces	Kenya	2010	O103	H8	NZ CYFD01000013	GGTGCGCATAATGTATATTTAGTTTAAC	AGTGCGCATAATGTATATTATGTTAAAT	72	G
Escherichia coli	G302544	GCF_001285905.1	Homo sapiens/feces	Mozambique	20009	O103	H8	NZ CYFR01000027	GGTGCGCATAATGTATATTTAGTTTAAC	AGTGCGCATAATGTATATTATGTTAAAT	73	G
Escherichia coli	sheep 20	GCF_001616535.1	Ovis aries/feces	China	2013	n/a	n/a	NZ LVPP01000067	GGTGCGCATAATGTATATTTAGTTTAAC	AGTGCGCATAATGTATATTATGTTAAAT	74	G
Escherichia coli	06-00048	GCF_001677475.1	Medicago sativa	USA	2006	O36	H14	NZ CP015229	GGTGCGCATAATGTATATTTAGTTTAAC	AGTGCGCATAATGTATATTATGTTAAAT	75	H
Escherichia coli	MOD1-EC2703	GCF_002516285.1	n/a	USA	2014	O36	H14	NZ NJSK01000007	GGTGCGCATAATGTATATTTAGTTTAAC	AGTGCGCATAATGTATATTATGTTAAAT	76	H
Escherichia coli	116E1	GCF_004005345.1	Homo sapiens	France	2017	n/a	n/a	RZVD01000148	GGTGCGCATAATGTATATGATGTTAAGG	AGTGCGCATAATGTATATTATGTTAAAT	77
Escherichia coli	MOD01-EC5005	GCF_002233475.1	Equus caballus/small intestine	USA	2010	O101/162	H7	NZ NLUT01000003	TGTGCGCATAATGTATATGATGTTAAGG	AGTGCGCATAATGTATATTATGTTAAAT	78
Escherichia coli	CFSAN025100	GCF_001571885.1	Bos taurus	USA	2011	O26	H11	NZ LPYE01000173	GGTGCGCATAATGTAAGGTTATGTCAAA	GGTGCGCATAATGTATATTATGTTAAAT	79	I
Escherichia coli	CFSAN025098	GCF_001571845.1	Bos taurus	USA	2011	O26	H11	NZ LPYC01000202	GGTGCGCATAATGTAAGGTTATGTCAAA	GGTGCGCATAATGTATATTATGTTAAAT	80	I
Escherichia coli	CFSAN025101	GCF_001572185.1	Bos taurus	USA	2011	O26	H11	NZ LPYF01000206	GGTGCGCATAATGTAAGGTTATGTCAAA	GGTGCGCATAATGTATATTATGTTAAAT	81	I
Escherichia coli	CFSAN025105	GCF_001572525.1	Bos taurus	USA	2011	O26	H11	NZ LPZD01000010	GGTGCGCATAATGTAAGGTTATGTCAAA	GGTGCGCATAATGTATATTATGTTAAAT	82	I
Escherichia coli	VREC0615	GCF_900480535.1	Bos taurus/feces	UK	2015	n/a	n/a	NZ UDBR01000003	GGTGCGCATAATGTAAAGTTATGTCAAA	GGTGCGCATAATGAGGCGTTATGGTAAA	83	I
Escherichia coli	VREC0546	GCF_900490155.1	Gallus gallus/feces	UK	2015	n/a	n/a	NZ UEJR01000034	AGTGCGCATAATGTATATGATGTTAAGG	AGTGCGCATAATGTATATTATGTTAAAT	84	J
Escherichia coli	VREC0535	GCF_900479975.1	Gallus gallus/feces	UK	2015	n/a	n/a	NZ UCZA01000033	AGTGCGCATAATGTATATGATGTTAAGG	AGTGCGCATAATGTATATTATGTTAAAT	85	J
Escherichia coli	MOD1-EC5627	GCF_002227505.1	Gallus gallus/feces	USA	1980	O15	H40	NZ NLKE01000049	GGTGCGCATAATGTATATGATGTTAAGG	AGTGCGCATAATGTATATTATGTTAAAT	86
Escherichia coli	CVM N17EC0370	GCA_003774185.1	Gallus gallus legs	USA	2018	n/a	n/a	ROEE01000020	GGTGCGCATAATGTATATTTAGTTTAAC	AGTGCGCATAATGTATATTATGTTAAAT	87
Citrobacter braakii*	TSA-1	GCF_002289385.1	Isoptera/hindgut	USA	2013	n/a	n/a	NZ NSCC01000046	n/a	AGTGCGCATAATGTATATTATGTTAAAT	88
Escherichia marmotae*	MOD1-EC6163	GCF_002965785.1	Somateria fischeri/feces	USA	2012	O10	H57	NZ PTSA01000028	GGTGCGCATAATGTAGCGTTATGTCAAA	GATGCGCATAATGTATATTATGTTAAAT	89
Escherichia coli	CVM N17EC0592	GCF_004309675.1	Gallus gallus/Breasts	USA	2017	n/a	n/a	RNSI01000030	AGTGCGCATAATGTATATTAAGTTTAAC	AGTGCGCATAATGTATATTATGTTAAAT	90
Escherichia coli	SL3	GCF_004309675.1	Animal/feces	South Africa	2017	n/a	n/a	SISD01000106	GGTGCGCATAATGTATATTTAGTTTAAC	AGTGCGCATAATGTATATT	91
Escherichia coli	HT2012009	GCF_002972015.1	Marmota himalayana	China	2012	n/a	n/a	NZ JZOP01000103	GGTGCGCATAATGTATATTTAGTTTAAT	AGTGCGCATAATGTATATTATGTTAAAT	92
Salmonella enterica	84-1315	GCF_002046725.1	n/a	n/a	n/a	n/a	n/a	NZ MZBN01000005	TGCGCATAATGTATATTTAGTTAATTAA	AGTGCGCATAATGTATATTATGTTAAAT	93
Enterobacter cloacae	NH52	GCF_900050915.1	n/a	n/a	n/a	n/a	n/a	LT160614		AGTGCGCATAATGTATATTATGTTAAAT	94
Kosakonia cowanii	Esp Z	GCF_002250015.1	Anopheles arabiensis	Zambia	2010	n/a	n/a	NZ CP022690	GGTGCGTATAATGTTACGTTATGTTAAT	GGTGCGCTTAATGTATATTATGTTAAAT	95
*Listed as sp. on NCBI, species identity determined using https://gtdb.ecogenomic.org/
