# Supplementary material for: Resurrection of a global, metagenomically defined gokushovirus
Source: eLife. 2020 Feb 26;9:e51599. doi: 10.7554/eLife.51599 (PMC7062461; doi:10.7554/eLife.51599)
Supplement: Supplementary file 2. [file elife-51599-supp2.xlsx]

## Sheet: Sheet1
Supplementary File 5. Enterogokushoviral gene order and conservation within Gokushovirinae.
Enterogokushovirus	all Escherichia	VP4	VP5	VP3	VP1	VP2	VP8
	Citrobacter braakii TSA-1	VP4	VP5	VP3	VP1	VP2	VP8
	Kosakonia cowanii Esp. Z	VP4	VP5	VP3	VP1	VP2	VP8
	Enterobacter cloacae NH52	VP4	VP5	VP3	VP1	VP2	VP8
	Salmonella enterica 84-1315	VP4	VP5	VP3	VP1	VP2	VP8
other isolated Gokushovirinae	NC_003438 Spiroplasma	VP4	other	other	other	VP3	VP1	VP2
	NC_002643 Bdellovibrio	VP4	VP1	VP2	VP5	other	VP3	VP8
	AE002163 Chlamydia	VP4	VP5	VP1	VP2	VP3	other	VP8	other
	AJ270057 Chlamydia	VP4	VP5	VP1	VP2	VP3	other	VP8
	AJ550635 Chlamydia	VP4	VP5	VP1	VP2	VP3	other	VP8	other
	AY769964 Chlamydia	VP4	VP5	VP1	VP2	VP3	other	VP8
	NC_001741 Chlamydia	VP4	VP5	VP1	VP2	VP3	VP8
	NC_001998 Chlamydia	VP4	VP5	VP1	VP2	VP3	other	VP8	other
	NC_002180 Chlamydia	VP4	VP5	VP1	VP2	VP3	other	VP8	other
	NC_002194 Chlamydia	VP4	VP5	VP1	VP2	VP3	other	VP8
	NC_007461 Chlamydia	VP4	VP5	VP1	VP2	VP3	other	VP8
	KR704914	VP4	VP1	VP2
	KT264749	VP4	VP8	VP5	VP3	VP1	VP2
	KT264750	VP4	VP8	VP5	VP3	VP1	VP2
	KT264751	VP4	VP8	VP5	VP3	VP1	VP2
	KT264753	VP4	VP8	VP5	VP3	VP1	VP2
	KT264754	VP4	VP8	VP5	VP3	VP1	VP2
	KT264755	VP4	VP8	VP5	VP3	VP1	VP2
	KT264756	VP4	VP8	VP5	VP3	VP1	VP2
	KT264757	VP4	VP8	VP5	VP3	VP1	VP2
	KT264758	VP4	VP8	VP1	VP2
	KT264759	VP4	VP8	VP5	VP3	VP1	VP2
	KT264760	VP4	VP8	VP5	VP3	VP1	VP2
	KT264761	VP4	VP8	VP5	VP3	VP1	VP2
	KT264762	VP4	VP5	VP1	VP2
	KT264763	VP4	VP8	VP5	VP3	VP1	VP2
	KT264764	VP4	VP8	VP5	VP3	VP1	VP2
	KT264765	VP4	VP8	VP5	VP3	VP1	VP2
	KT264766	VP4	VP5	VP3	VP1	VP2
	KT264767	VP4	VP8	VP5	VP3	VP1	VP2
	KT264768	VP4	VP8	VP5	VP3	VP1	VP2
	KT264769	VP4	VP8	VP3	VP1	VP2
	KT264770	VP4	VP8	VP5	VP3	VP1	VP2
	KT264771	VP4	VP8	VP5	VP3	VP1	VP2
	KT264772	VP4	VP8	VP5	VP3	VP1	VP2
	KT264773	VP4	VP8	VP5	VP3	VP1	VP2
	KT264774	VP4	VP8	VP5	VP3	VP1	VP2
	KT264775	VP4	VP5	VP3	VP1	VP2
	KT264776	VP4	VP5	VP3	VP1	VP2
	KT264777	VP4	VP5	VP3	VP1	VP2
	KT264778	VP4	VP5	VP3	VP1	VP2
	KT264779	VP4	VP8	VP5	VP3	VP1	VP2
	KX513865	VP4	VP8	VP5	VP3	VP1	VP2
	MG025518	VP4	VP8	VP5	VP3	VP1	VP2
	MH552509	VP4	VP8	VP5	VP3	VP1	VP2
	MH552523	VP4	VP8	VP5	VP3	VP1	VP2
	MH552567	VP4	VP8	VP5	VP3	VP1	VP2
	MH616663	VP4	VP8	VP5	VP3	VP1	VP2
	MH617034	VP4	VP8	VP5	VP3	VP1	VP2
	MH617217	VP4	VP8	VP5	VP3	VP1	VP2
	MH617405	VP4	VP8	VP5	VP3	VP1	VP2
	MH617506	VP4	VP8	VP5	VP3	VP1	VP2
	MH617691	VP4	VP8	VP5	VP3	VP1	VP2
	MH622917	VP4	VP8	VP5	VP3	VP1	VP2
	MH622932	VP4	VP8	VP5	VP3	VP1	VP2
	MH649004	VP4	VP8	VP5	VP3	VP1	VP2
	MH649140	VP4	VP8	VP5	VP3	VP1	VP2
	MH649153	VP4	VP8	VP5	VP3	VP1	VP2
	NC_030476	VP4	VP5	VP3	VP1	VP2
	MH510273	VP4	VP1	other	VP2	other
	MH552557	VP4	VP1	other	VP2	other	other	other	other
	MH552576	VP4	VP1	other	VP2
	MH616884	VP4	VP1	other	VP2	other
	MH616904	VP4	VP1	other	VP2	other
	MH617173	VP4	VP1	other	VP2
	MH617310	VP4	VP1	other	VP2	other	other	other
	MH617627	VP4	VP1	other	VP2	other	other
	MH648894	VP4	VP1	other	VP2	other
	KT264818	VP4	VP5	VP3	VP1	VP2	other	VP8
	KT264819	VP4	VP5	VP3	VP1	VP2	other	VP8
	KX513867	VP4	VP5	VP3	VP1	VP2	other	VP8
	KX513872	VP4	VP5	VP3	VP1	VP2	other	VP8
	KX513874	VP4	VP5	VP3	VP1	VP2	other	VP8
	KT264784	VP4	VP8	VP5	VP3	VP1	VP2
	KT264785	VP4	VP8	VP5	VP3	VP1	VP2
	KX513864	VP4	VP8	other	VP3	VP1	VP2
	KX513873	VP4	VP8	VP3	VP1	VP2
	KX513876	VP4	VP8	other	VP1	VP2		0
	MH648955	VP4	VP8	VP5	VP3	VP1	VP2
	NC_003438	VP4	other	other	other	other	other	VP1	VP2
	KT264822	VP4	VP5	VP3	VP1	VP2	VP8
	MH617663	VP4	VP5	VP3	VP1	VP2	VP8
	KR704913	VP4	VP8	VP3	VP1	VP2
	KR704915	VP4	VP8	VP3	VP1	VP2
	NC_030458	VP4	VP8	VP3	VP1	VP2
	NC_030472	VP4	VP8	VP3	VP1	VP2
	KT264829	VP4	VP5	VP3	VP1	VP2
	KX513869	VP4	VP5	VP3	VP1	VP2
	KT264781	VP4	VP8	VP5	VP1	VP2
	KT264782	VP4	VP8	VP5	VP1	VP2
	KT264783	VP4	VP8	VP5	VP1	VP2
	KX513866	VP4	VP8	VP5	VP1	VP2
	KX513870	VP4	VP8	VP5	VP1	VP2	other
	MH552483	VP4	VP8	VP5	VP1	VP2
	MH552544	VP4	other	VP8	other	VP1	VP2
	MH616748	VP4	other	VP8	other	VP1	VP2
	MH617438	VP4	other	VP8	other	VP1	VP2
	AE002163	VP4	VP1	VP2	VP3	VP8
	AJ270057	VP4	other	VP1	VP2	VP3	VP8
	AJ550635	VP4	other	VP1	VP2	VP3	VP8
	AY769964	VP4	other	VP1	VP2	VP3	VP8
	NC_001741	VP4	other	VP1	VP2	VP3	VP8
	NC_001998	VP4	other	VP1	VP2	VP3	VP8
	NC_002180	VP4	other	VP1	VP2	VP3	VP8
	NC_002194	VP4	other	VP1	VP2	VP3	VP8
	NC_007461	VP4	other	VP1	VP2	VP3	VP8
