# Supplementary material for: Resurrection of a global, metagenomically defined gokushovirus
Source: eLife. 2020 Feb 26;9:e51599. doi: 10.7554/eLife.51599 (PMC7062461; doi:10.7554/eLife.51599)
Supplement: Supplementary file 3. [file elife-51599-supp3.xlsx]

## Sheet: Sheet1
Supplementary File 2: Reference strains for host-phylogeny.
ECOR-Strain	WGS Accession	RefSeq Accession
ECOR-1	QOWM00000000	GCF_003334405.1
ECOR-2	QOWN00000000	GCF_003334385.1
ECOR-3	QOWO00000000	GCF_003334815.1
ECOR-4	QOWP00000000	GCF_003334355.1
ECOR-5	QOWQ00000000	GCF_003334335.1
ECOR-6	QOWR00000000	GCF_003334315.1
ECOR-7	QOWS00000000	GCF_003334305.1
ECOR-8	QOWT00000000	GCF_003334765.1
ECOR-9	QOWU00000000	GCF_003334255.1
ECOR-10	QOWV00000000	GCF_003334785.1
ECOR-11	QOWW00000000	GCF_003334245.1
ECOR-12	QOWX00000000	GCF_003334775.1
ECOR-13	QOWY00000000	GCF_003334235.1
ECOR-14	QOWZ00000000	GCF_003334705.1
ECOR-15	QOXA00000000	GCF_003334225.1
ECOR-16	QOXB00000000	GCF_003334675.1
ECOR-17	QOXC00000000	GCF_003334175.1
ECOR-18	QOXD00000000	GCF_003334715.1
ECOR-19	QOXE00000000	GCF_003334165.1
ECOR-20	QOXF00000000	GCF_003334155.1
ECOR-21	QOXG00000000	GCF_003334145.1
ECOR-22	QOXH00000000	GCF_003334115.1
ECOR-23	QOXI00000000	GCF_003334095.1
ECOR-24	QOXJ00000000	GCF_003334085.1
ECOR-25	QOXK00000000	GCF_003334065.1
ECOR-26	QOXL00000000	GCF_003334035.1
ECOR-27	QOXM00000000	GCF_003334665.1
ECOR-28	QOXN00000000	GCF_003334015.1
ECOR-29	QOXO00000000	GCF_003334005.1
ECOR-30	QOXP00000000	GCF_003333975.1
ECOR-31	QOXQ00000000	GCF_003333945.1
ECOR-32	QOXR00000000	GCF_003333935.1
ECOR-33	QOXS00000000	GCF_003333925.1
ECOR-34	QOXT00000000	GCF_003334625.1
ECOR-35	QOXU00000000	GCF_003334735.1
ECOR-36	QOXV00000000	GCF_003333875.1
ECOR-37	QOXW00000000	GCF_003333865.1
ECOR-38	QOXX00000000	GCF_003334605.1
ECOR-39	QOXY00000000	GCF_003333855.1
ECOR-40	QOXZ00000000	GCF_003333845.1
ECOR-41	QOYA00000000	GCF_003333795.1
ECOR-42	QOYB00000000	GCF_003333785.1
ECOR-43	QOYC00000000	GCF_003333775.1
ECOR-44	QOYD00000000	GCF_003333765.1
ECOR-45	QOYE00000000	GCF_003333735.1
ECOR-46	QOYF00000000	GCF_003334585.1
ECOR-47	QOYG00000000	GCF_003333715.1
ECOR-48	QOYH00000000	GCF_003334535.1
ECOR-49	QOYI00000000	GCF_003333685.1
ECOR-50	QOYJ00000000	GCF_003333675.1
ECOR-51	QOYK00000000	GCF_003334615.1
ECOR-52	QOYL00000000	GCF_003334495.1
ECOR-53	QOYM00000000	GCF_003333655.1
ECOR-54	QOYN00000000	GCF_003333615.1
ECOR-55	QOYO00000000	GCF_003333605.1
ECOR-56	QOYP00000000	GCF_003334485.1
ECOR-57	QOYQ00000000	GCF_003334555.1
ECOR-58	QOYR00000000	GCF_003333645.1
ECOR-59	QOZF00000000	GCF_003335465.1
ECOR-60	QOYS00000000	GCF_003333585.1
ECOR-61	QOYT00000000	GCF_003333565.1
ECOR-62	QOYU00000000	GCF_003333545.1
ECOR-63	QOYV00000000	GCF_003333505.1
ECOR-64	QOYW00000000	GCF_003334525.1
ECOR-65	QOYX00000000	GCF_003333495.1
ECOR-66	QOYY00000000	GCF_003333435.1
ECOR-67	QOYZ00000000	GCF_003334465.1
ECOR-68	QOZA00000000	GCF_003333425.1
ECOR-69	QOZB00000000	GCF_003334435.1
ECOR-70	QOZC00000000	GCF_003333475.1
ECOR-71	QOZD00000000	GCF_003333385.1
ECOR-72	QOZE00000000	GCF_003334425.1
K12 MG1655	U00096	GCF_000005845.2
