# Supplementary material for: Resurrection of a global, metagenomically defined gokushovirus
Source: eLife. 2020 Feb 26;9:e51599. doi: 10.7554/eLife.51599 (PMC7062461; doi:10.7554/eLife.51599)
Supplement: Supplementary file 5. [file elife-51599-supp5.xlsx]

## Sheet: Sheet1
Supplementary File 4: Primers used in this study.
Primer	Sequence	Function
MOD1-EC5150_fw	TAAGGTGCGCATACGTGATTTCAG	Binds directly downstream of bacterial dif-site for MOD1-EC5150
MOD1-EC6098fw	AAGGTGCGCATATGCGTATTCTG	Binds directly downstream of bacterial dif-site for MOD1-EC6098, MOD1-EC2703
MOD1_EC6163_fw	TCAAAGGGCGCTTCCTTAATTTCTG	Binds directly downstream of bacterial dif-site for MOD1-EC6163
MOD1-EC2703_rev	GGTGCGCATAATGTATATTTAGTTTAAC	Binds phage-dif-site of MOD1-EC2703, MOD1-EC5150, MOD1-EC6098
MOD1_EC6163_rev	GTGCGCATAATGTAGCGTTATGTC	Binds phage-dif-site of MOD1-6163
MOD1-EC6098_noXerCD_rev	GAAAACAACGACTTACGATAATTATCATAG	Reverse primer, binds directly upstream of phage dif-site
MOD1_EC6098_noXerC_rev	TGTATATTTAGTTTAACGAAAACAAC	Reverse primer excluding 11bp XerC-binding motif of phage dif-site
MOD1-EC6098_noXerD_rev	GGTGCGCATAATGTATAGAAAACAACGACTTACGATAATTATCATAG	Reverse primer excluding 11bp XerD-binding motif of phage dif-site
nocode_fw	GTAATTATGGCTCGTTCTCG	Binds downstream of EC6098 VP2
VP2_fw	ATGGGCTTTTTATCATCTGCC	Forward primer, binds at 5'-end of EC6098 VP2
VP5_rev	GGTATGGAACTTAGGCTTCGA	Reverse primer, binds at 3'-end of EC6098 VP5
MG16155_fw	GCATGGGGCAGGGAATAACC	Binds upstream of E.coli BW25113 dif-site
MG1655_rev	GTTAATGAGCATGACAATCATGAC	Reverse Primer, binds downstream of E.coli BW25113 dif-site
Circle_1	GTTCTCGCCGTCGTATG	Binds conserved region downstream of EC6098 VP2
Circle_2	GTAAGTACGCAAAGACGCAT	Binds conserved region downstream of EC6098 VP2
XerC_fw_EcoRI	GATCGGAATTCATGACCGATTTACACACCGA	Binds 5'-end of BW25113 xerC, contains EcoRI restriction site
XerC_rev_SacI	GATCGGAGCTCTTATTTCCCCCGTTTGGC	Reverse primer, binds 3'-end of BW25113 xerC, contains SacI restriction site
XerD_fw_EcoRI	GATCGGAATTCATGATGGTGGAGTGGTTG	Binds 5'-end of BW25113 xerD, contains EcoRI restriction site
XerD_rev_SacI	GATCGGAGCTCCTTTCTTCATAAATCTTCCC	Reverse primer, binds 3'-end of BW25113 xerD, contains SacI restriction site
