# Supplementary figures and images for: Resurrection of a global, metagenomically defined gokushovirus
Source: eLife journal article supplement (doi:10.7554/elife.51599), 2020-02-26

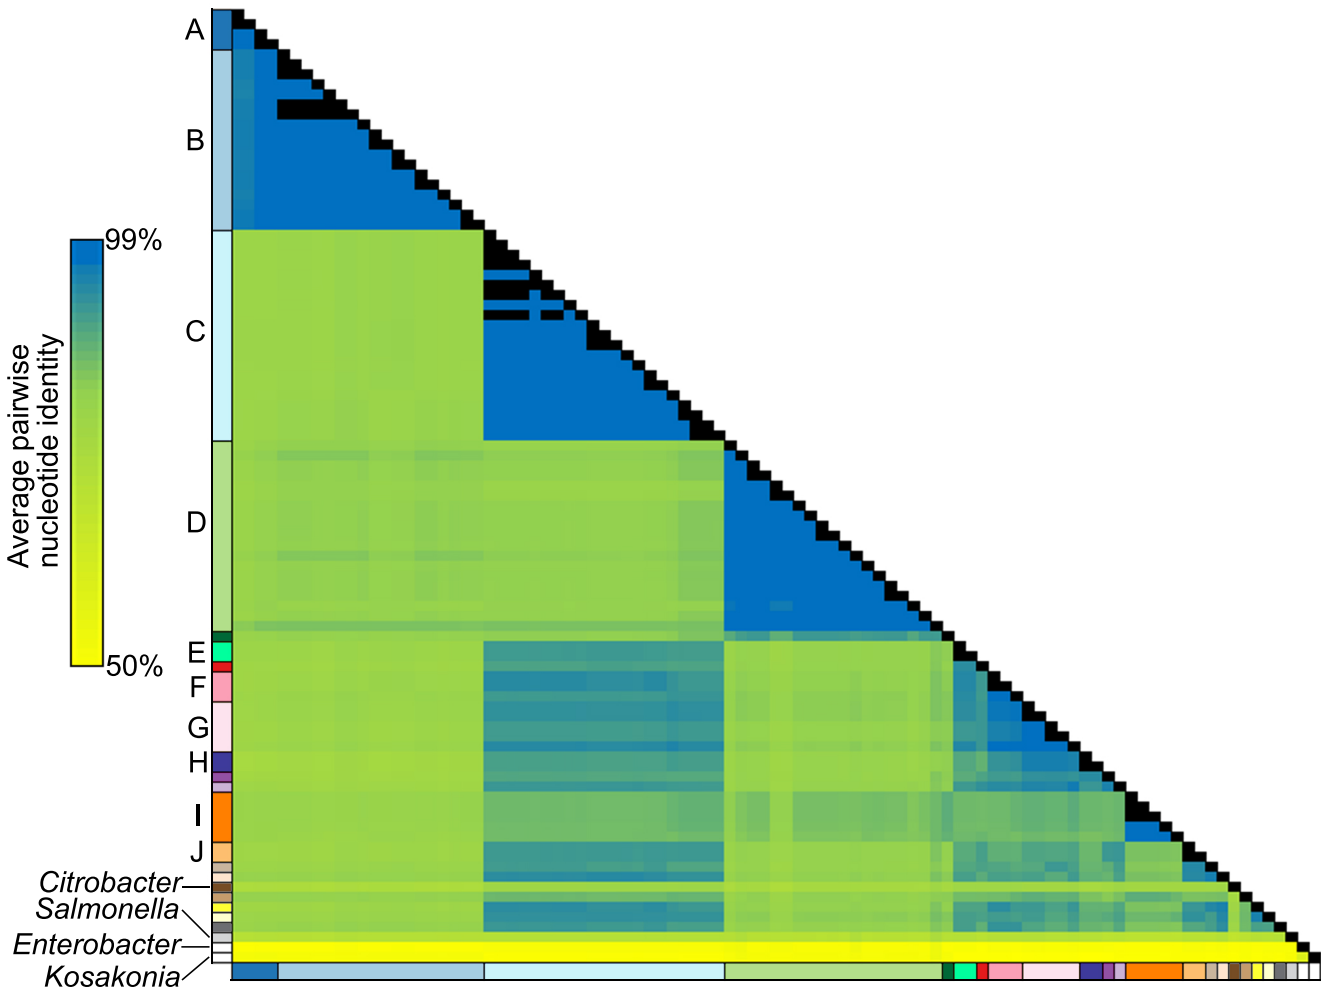

Supplement: supp [file elife_poa_e51599_Figure_1_figure_supplement_1.pdf › elife_poa_e51599_Figure_1_figure_supplement_1.pdf]

**A**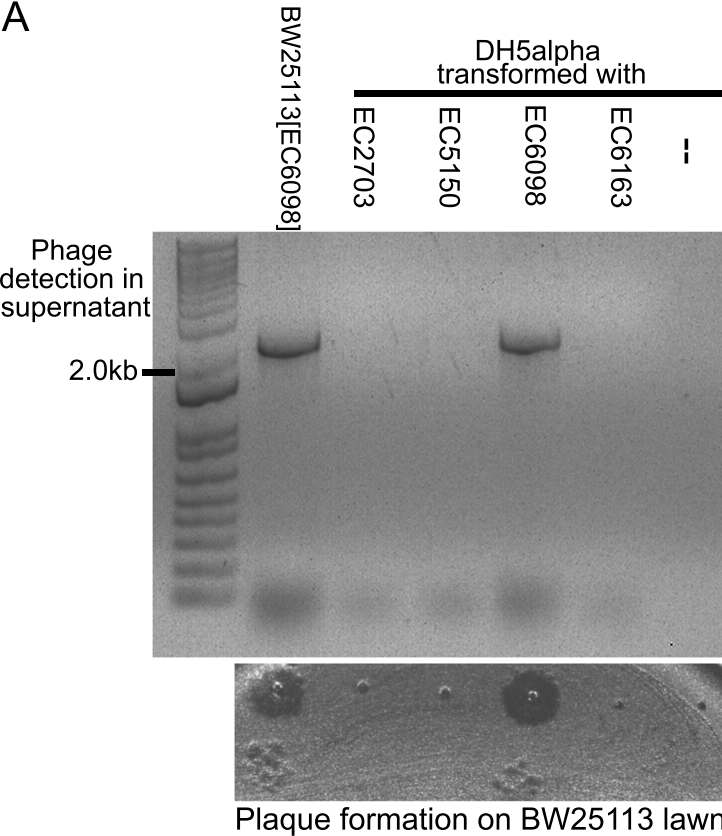**B**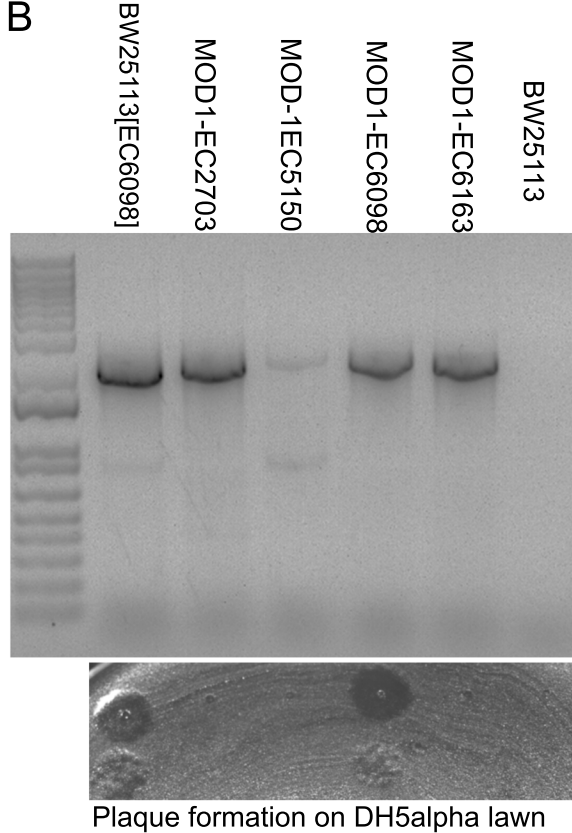

Supplement: supp [file elife_poa_e51599_Figure_3_figure_supplement_1.pdf › elife_poa_e51599_Figure_3_figure_supplement_1.pdf]
